# Supplementary material for: Designing MoS2 nanocatalysts with increased exposure of active edge sites for anthracene hydrogenation reaction
Source: Royal Society of Chemistry journal article supplement (doi:10.1039/c7cy01026e), 2017-01-01
Supplement: c7cy01026e1.pdf [file c7cy01026e1.pdf]

### Supporting information

Designing MoS<sub>2</sub> nanocatalysts with high exposure of active edge sites for anthracene hydrogenation reaction

*Yuxia Jiang<sup>a,b, ‡</sup>, Donge Wang<sup>a, ‡</sup>, Jiahe Li<sup>a,b</sup>, Min Li<sup>a,b</sup>, Zhendong Pan<sup>a</sup>, Huaijun Ma<sup>a</sup>, Guang Lv<sup>a,b</sup>, Wei Qu<sup>a</sup>, Lin Wang<sup>a</sup>, Zhijian Tian<sup>a,c,\*</sup>*

a Dalian National Laboratory for Clean Energy, Dalian Institute of Chemical Physics, Chinese Academy of Sciences, Dalian 116023, China

b University of Chinese Academy of Sciences, Beijing 100049, China

c State Key Laboratory of Catalysis, Dalian Institute of Chemical Physics, Chinese Academy of Sciences, Dalian 116023, China

**‡ These authors contributed equally to this work.**

**Figure captions:**

Table S1 The intensities of (100) and (110) diffraction peaks ( $I_{(100)}$  and  $I_{(110)}$ ) in the XRD patterns and specific surface areas (SSA) of synthesized and commercial  $\text{MoS}_2$  catalysts

Fig. S1 TG curves of  $\text{MoS}_2$  samples.

Fig. S2 EDX spectra of the indicated selected area in (a)  $\text{MoS}_2$ -DW, and (b)  $\text{MoS}_2$ -EG.

Fig. S3 XPS spectra of  $\text{MoS}_2$ -DW sample: (a) N 1s, (b) Mo 3d, (c) S 2p, and (d) O1s.

Fig. S4 XPS spectra of  $\text{MoS}_2$ -EG sample: (a) N 1s, (b) Mo 3d, (c) S 2p, and (d) O1s.

Table S1 The intensities of (100) and (110) diffraction peaks ( $I_{(100)}$  and  $I_{(110)}$ ) in the XRD patterns and specific surface areas (SSA) of synthesized and commercial MoS<sub>2</sub> catalysts

| <b>Catalyst</b>             | <b><math>I_{(100)}</math></b> | <b><math>I_{(110)}</math></b> | <b>SSA(m<sup>2</sup>/g)</b> | <b>HP(%)</b> | <b>S<sub>AH8</sub>(%)</b> |
|-----------------------------|-------------------------------|-------------------------------|-----------------------------|--------------|---------------------------|
| <b>MoS<sub>2</sub>-com.</b> | 3055.3                        | 1832.0                        | 4.1                         | 15.7         | 2.5                       |
| <b>MoS<sub>2</sub>-DW</b>   | 253.3                         | 153.7                         | 23.0                        | 43.0         | 56.8                      |
| <b>MoS<sub>2</sub>-EG</b>   | 162.4                         | 81.2                          | 20.7                        | 51.0         | 72.1                      |
| <b>MoS<sub>2</sub>-CN</b>   | 870.4                         | 465.3                         | 8.1                         | 45.1         | 58.2                      |
| <b>MoS<sub>2</sub>-CH</b>   | 853.0                         | 405.1                         | 20.9                        | 25.7         | 17.0                      |

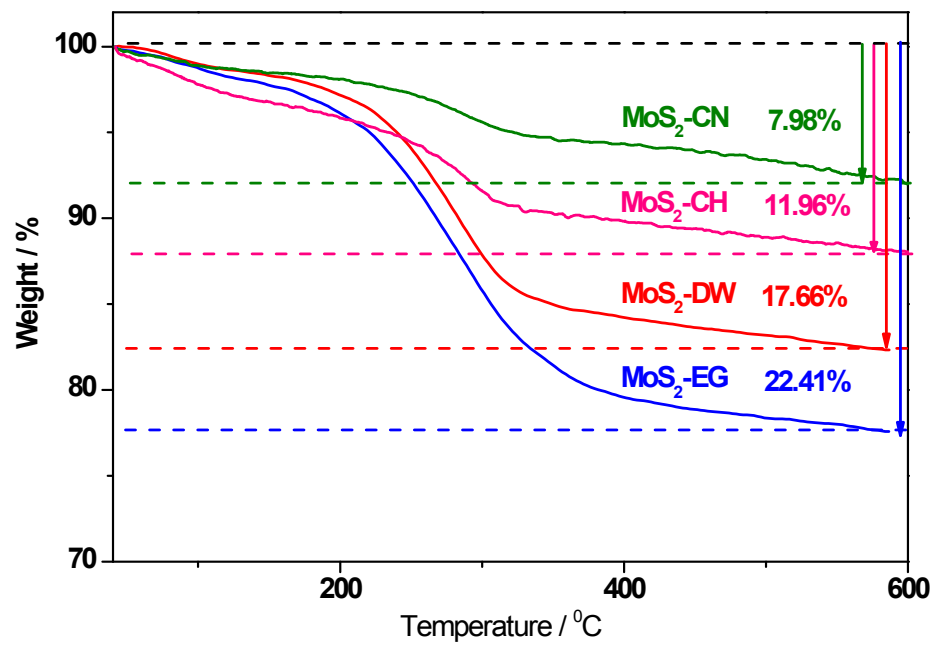

Fig. S1 TG curves of MoS<sub>2</sub> samples.

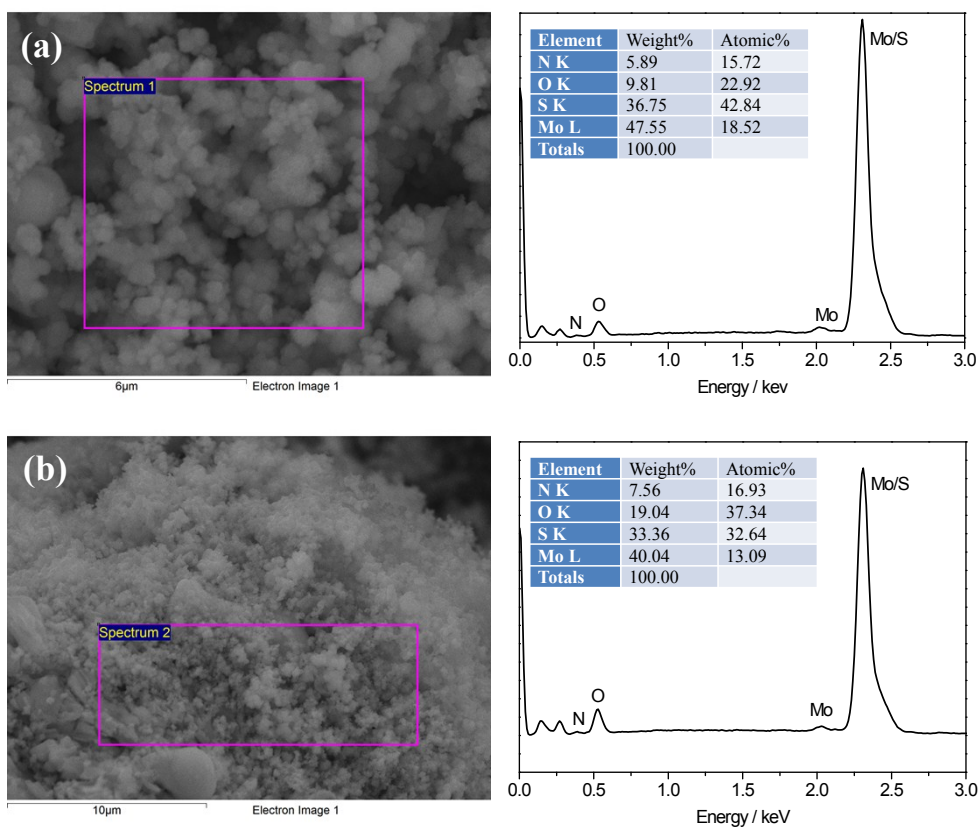

Fig. S2 EDX spectra of the indicated selected area in (a) MoS<sub>2</sub>-DW, and (b) MoS<sub>2</sub>-EG.

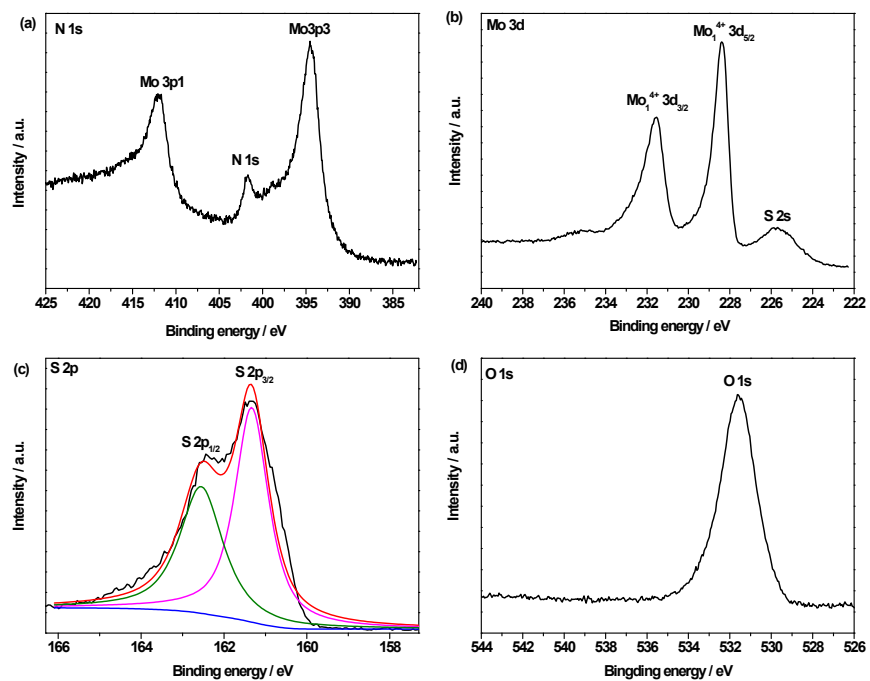

Fig. S3 XPS spectra of MoS<sub>2</sub>-DW sample: (a) N 1s, (b) Mo 3d, (c) S 2p, and (d) O1s.

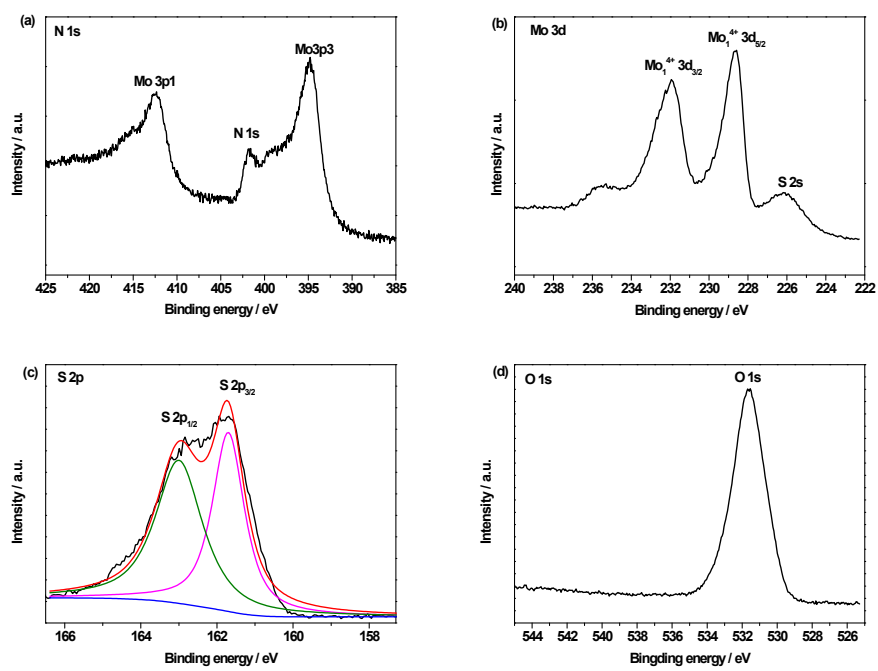

Fig. S4 XPS spectra of MoS<sub>2</sub>-EG sample: (a) N 1s, (b) Mo 3d, (c) S 2p, and (d) O 1s.
